# Supplementary material for: CD8+ and CD4+ cytotoxic T cell escape mutations precede breakthrough SIVmac239 viremia in an elite controller
Source: PubMed Central journal article supplement (PMC3496649; doi:10.1186/1742-4690-9-91), 2012-11-06
Supplement: 1742-4690-9-91-S2.pdf [file 1742-4690-9-91-S2.pdf]

**Supplemental Figure 2: Amino acid changes in SIV Env from r00032 post breakthrough are common mutations.**

| Animal | Time Point | Env <sub>62-71</sub> | Env <sub>111-120</sub> | Env <sub>134-143</sub> | Env <sub>411-420</sub> | Env <sub>506-520</sub>             | Env <sub>619-630</sub> | Env <sub>749-760</sub> |
|--------|------------|----------------------|------------------------|------------------------|------------------------|------------------------------------|------------------------|------------------------|
|        |            | GDYSEVALNV           | MRCNKSETDR             | TSTTASAKVD             | VEDRNTANQK             | GLAPTDVKRYTTGGT                    | TTVPWPNASLTP           | KERDGGEGGGNS           |
| r00032 | 107 WPI    | ---M---              | ---N---                | ---V---                | ---T---                | ---G---A---                        | -----N---              | --G-----               |
| r00014 | 79 WPI     | ---L---              | ---N---                | ---E---                | ::::::::::             | ---N---A---                        | -----N---              | --G-----               |
| r00021 | 72 WPI     | ---M---              | ---                    | X---                   | ---X---                | ---N---A---                        | ::::::::::             | --G-----               |
| r00041 | 18 WPI     | ---M---              | ---                    | ---                    | ::::::::::             | ---N---                            | ::::::::::             | --G-----               |
| r00044 | 98 WPI     | ---M---              | ---                    | ::::::::::             | ---T---                | ---S---                            | ::::::::::             | --G-----               |
| r00045 | 197 WPI    | ---M---              | ---                    | ---T-G-                | ::::::::::             | ---S---                            | -----NI--              | --G-----               |
| r00060 | 96 WPI     | ---L---              | ---N---                | ::::::::::             | ::::::::::             | ---S---                            | -----N---              | --G-----               |
| r01064 | 129 WPI    | ---M---              | ---                    | ::::::::::             | ::::::::::             | ---S---                            | ::::::::::             | --G-----R              |
| r01088 | 49 WPI     | ---M---              | ---                    | ---                    | ---D---                | ---                                | ::::::::::             | --G-----R              |
| r80035 | 32 WPI     | ---M---              | ---                    | ---                    | ::::::::::             | ::::::::::                         | ::::::::::             | --G-----               |
| r95096 | 480 WPI    | ---M---              | ---                    | ---AA---E-             | ---T---                | ---S---                            | ::::::::::             | --G-----               |
| r96107 | 62 WPI     | ---L---              | -I---                  | A---T-E-               | ---T---                | ---X---A---                        | ::::::::::             | --G-----               |
| r96112 | 127 WPI    | ---M---              | ---N---                | ---                    | ---                    | ---N---                            | -----N---              | --G-----               |
| r97035 | 237 WPI    | ---M---              | ---                    | ::::::::::             | ::::::::::             | ---N---                            | ::::::::::             | --G-----               |
| r97073 | 88 WPI     | ---M---              | ---                    | ::::::::::             | ::::::::::             | ---P---                            | -----N---              | --G-----               |
| r97113 | 257 WPI    | ---M---              | ---X---                | ---                    | ---T---                | ---G---                            | ::::::::::             | --G-----S-             |
| r98030 | 65 WPI     | ---I---              | ---                    | -X---                  | ---T---                | ---N---                            | ::::::::::             | --G-----S--R           |
| r99005 | 37 WPI     | ---M---              | ---                    | ---                    | ::::::::::             | ---                                | ::::::::::             | --G-----               |
| rh2122 | 102 WPI    | ---M---              | ---                    | ::::::::::             | ---IT---               | ---N---                            | ::::::::::             | --G-----               |
| rh2161 | 43 WPI     | ---M---              | ---                    | ---                    | ---T---                | ---G---                            | ::::::::::             | --G-----               |
| r80025 | (TOD)      | ---L---              | ---                    | ---E---                | ---                    | ---N---                            | -----n-i               | --G-----               |
| r90131 | (TOD)      | ---M---              | ---                    | ---                    | ---                    | ---                                | -----n---              | --G-----               |
| r87108 | (TOD)      | ---M---              | ---                    | ---                    | ---                    | ---                                | -----n---              | --G-----               |
| r96114 | (TOD)      | ---M---              | ---                    | ---                    | ::::::::::             | ---                                | -----n---              | --G-----               |
| r95112 | (TOD)      | ---M---              | ---                    | ---                    | ---                    | ---                                | -----g---              | --G-----               |
| r96081 | (TOD)      | ---M---              | ---                    | ---                    | ---                    | ---n---                            | -----n---              | --G-----               |
| r97074 | (TOD)      | ---M---              | ---                    | ---                    | ---                    | ---G---                            | -----n---              | --G-----               |
| r97009 | (TOD)      | ---M---              | ---                    | ---                    | ---                    | ---n---                            | -----n---              | --G-----               |
| r81035 | (TOD)      | ---M---              | ---                    | ---T-e                 | ---                    | ---N---                            | -----n---              | --G-----               |
| r92077 | (TOD)      | ---M---              | ---                    | ---                    | ---                    | ---n---                            | -----I---              | --G-----               |
| r87082 | (TOD)      | ---M---              | ---                    | ---                    | ---                    | ---n---                            | -----n---              | --G-----               |
| r92050 | (TOD)      | ---M---              | ---                    | ---                    | ---                    | ---                                | -----n---              | --G-----               |
| r96016 | (TOD)      | ---M---              | ---                    | ---e-                  | ---Tknt                | ---h---a---                        | -----n---              | --G-----               |
| r96135 | (TOD)      | ---M---              | ---n---                | -a-                    | ---T---                | ---G---                            | -----N---              | --G-----               |
| r95086 | (TOD)      | ---L---              | ---                    | ---E-                  | ---T---                | ---N---                            | -----i---              | --G-----               |
| r93062 | (TOD)      | ---M---              | ---                    | ---                    | ::::::::::             | ---G---                            | -----n---              | --G-----               |
| r80035 | (TOD)      | ---M---              | ---                    | ---                    | ---                    | ---g---                            | -----n---              | --G-----               |
| r96123 | (TOD)      | ---L---              | ---n---                | -a-t                   | ---T---                | ---G---                            | -----i---              | --G-----               |
| r95045 | (TOD)      | ---M---              | ---N---                | ---                    | ---D---                | ---n---                            | -----S---              | --G-----               |
| r96020 | (TOD)      | ---L---              | ---N---                | -a-E-                  | ---T---                | ---H---A---                        | -----n---              | --G-----               |
| r85013 | (TOD)      | ---m---              | ---                    | ---E-                  | ---T---                | ---X---a---                        | -----n---              | --G-----               |
| r96104 | (TOD)      | ---M---              | ---                    | ---t                   | ---T---                | ---N---                            | -----n---              | --G-----Y-             |
| r96093 | (TOD)      | ---L---              | ---d---                | -a-E-                  | ---iT---               | ---n---                            | -----n---              | --G-----r              |
| r95084 | (TOD)      | ---M---              | ---                    | ---R-                  | ---                    | ---x---                            | -----i---              | --G-----               |
| r96072 | (TOD)      | ---L---              | ---                    | ---T-                  | ---T---                | ---H---A---                        | -----n---              | --G-----               |
| r93057 | (TOD)      | ---M---              | ---n---                | -Pm-e                  | ---T---                | ---H---                            | -----n---              | --G-----               |
| rh2127 | (TOD)      | ---M---              | ---R--n-               | ---e-                  | ---t---                | ---N---                            | -----g-i-              | --G-----               |
| r95003 | (TOD)      | ---L---              | ---                    | a---                   | ---T-:                 | ---n---                            | -----N---              | --G-----               |
| rh2065 | (TOD)      | d---M---             | ---                    | ---                    | ---T---                | ---G---                            | -----n---              | --G-----               |
| r95058 | (TOD)      | ---M---              | ---                    | ---                    | ---                    | ---n---                            | -----i---              | --G-----               |
| r95115 | (TOD)      | ---L---              | ---n---                | a-a                    | ::::::::::             | ---N---A---                        | -----n---              | --G-----               |
| rh1975 | (TOD)      | ---M---              | ---                    | ---e-                  | ---                    | ---N---                            | -----nI-               | --G-----               |
| r96118 | (TOD)      | ---                  | ---                    | ---                    | ---                    | ---                                | -N-----N-              | --G-----               |
| r96031 | (TOD)      | ---                  | ---k                   | -p-                    | ::::::::::             | ---S---                            | -----S---              | --G-----               |
| rh1937 | (TOD)      | ---M---              | ---                    | a---e-                 | ---T-:                 | ---n---                            | ---l--XNi-             | --G-----               |
| Totals |            | ---X---              | ---X---                | ---X---                | ---X---                | ---G---A---                        | -----X---              | --G-----               |
|        |            | (53/55)<br>(96.4%)   | (11/55)<br>(20.0%)     | (8/49)<br>(16.3%)      | (23/42)<br>(54.8%)     | (47/54) (10/54)<br>(87.0%) (18.5%) | (13/41)<br>(31.7%)     | (55/55)<br>(100%)      |
