# Supplementary material for: CD8+ and CD4+ cytotoxic T cell escape mutations precede breakthrough SIVmac239 viremia in an elite controller
Source: PubMed Central journal article supplement (PMC3496649; doi:10.1186/1742-4690-9-91), 2012-11-06

# Supplemental Figure 4

**A**

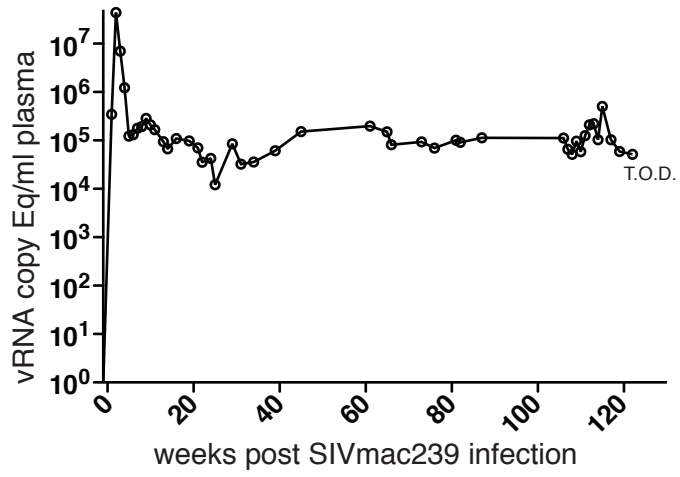

**B**

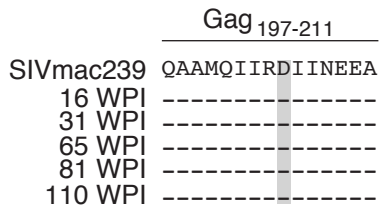

**C**

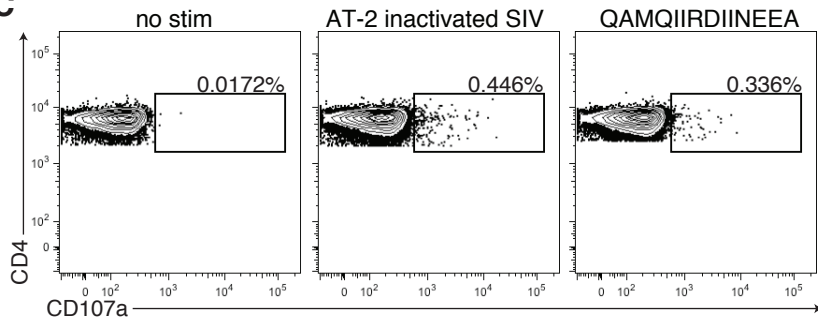

Supplement: 1742-4690-9-91-S4.pdf [file 1742-4690-9-91-S4.pdf]
