# Supplementary material for: CD8+ and CD4+ cytotoxic T cell escape mutations precede breakthrough SIVmac239 viremia in an elite controller
Source: PubMed Central journal article supplement (PMC3496649; doi:10.1186/1742-4690-9-91), 2012-11-06

## Supplemental Figure 5

**A**

---

| <b>Animal</b> | <b>MHC-II molecules present</b> |
|---------------|---------------------------------|
| r95071        | DRB1*06                         |
| r95096        | DRB1*06, DRB1*10:07             |
| rhAJ11        | DRB1*03:06                      |
| r00078        | DRB1*03:06                      |
| r01064        | DRB1*03:06                      |
| r98016        | DRB1*03:06                      |

---

**B**

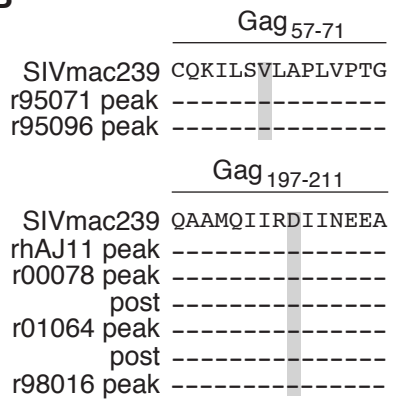

Supplement: 1742-4690-9-91-S5.pdf [file 1742-4690-9-91-S5.pdf]
